# Supplementary material
Source: Springer Nature journal article supplement (https://www.springermedizin.de/resource/supplementary/12936_2011_1762_MOESM5_ESM.pdf/9541672)

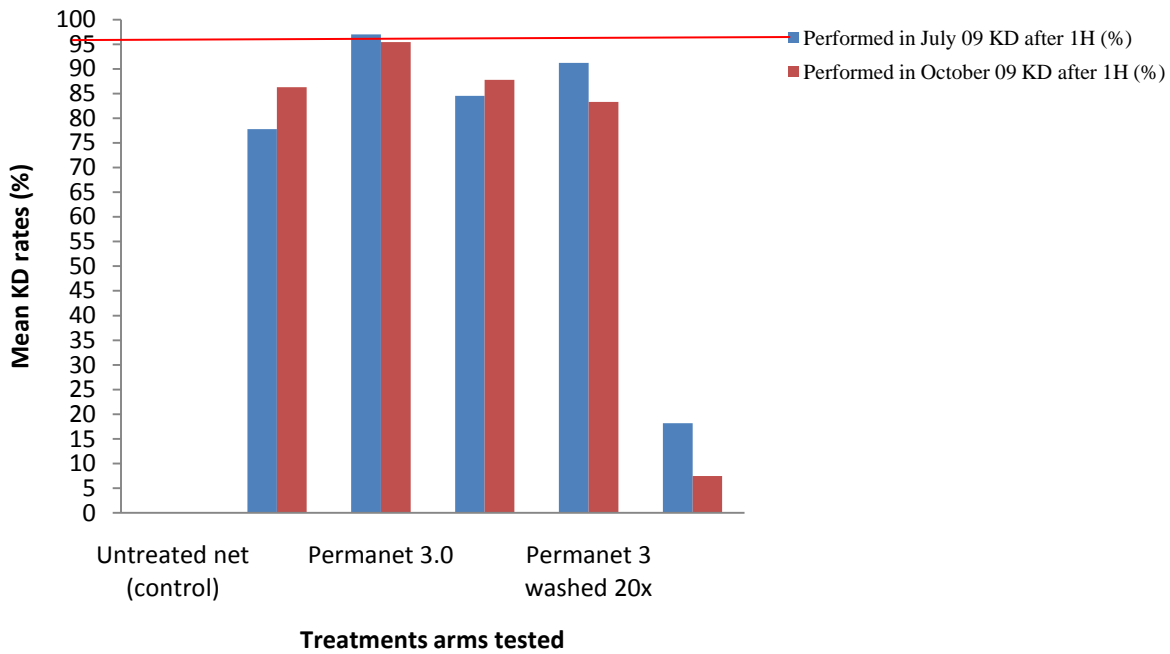

2a.

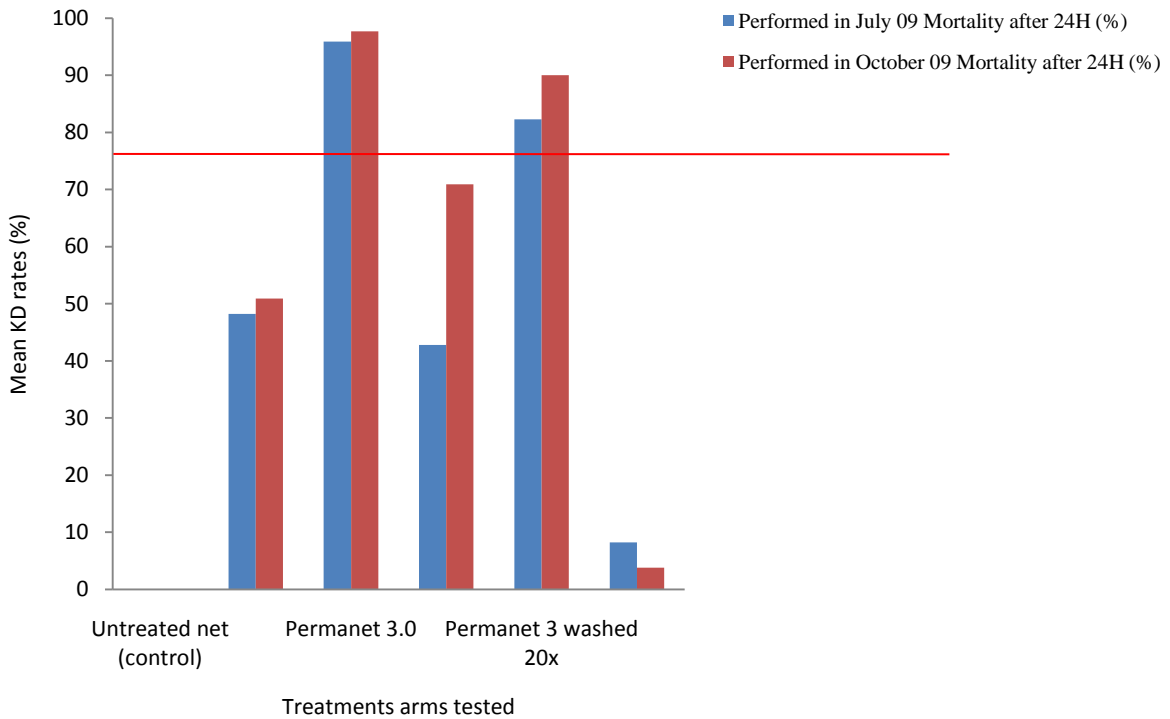

2b.

Supplement: MOESM5 [file 9541672]
